# Supplementary material
Source: PubMed Central journal article supplement (PMC4224629)

## **The influence of adnectin binding on the extracellular domain of epidermal growth factor receptor**

Roxana E. Iacob<sup>1</sup>, Guodong Chen<sup>2</sup>, Joomi Ahn<sup>3,#</sup>, Stephane Houel<sup>3</sup>, Hui Wei<sup>2</sup>, Jingjie Mo<sup>2</sup>, Li Tao<sup>4</sup>, Daniel Cohen<sup>5</sup>, Dianlin Xie<sup>5</sup>, Zheng Lin<sup>5</sup>, Paul E. Morin<sup>5</sup>, Michael L. Doyle<sup>5</sup>, Adrienne A. Tymiak<sup>2</sup> and John R. Engen<sup>1,\*</sup>

<sup>1</sup>Department of Chemistry & Chemical Biology, Northeastern University, Boston, MA USA; <sup>2</sup>Bioanalytical and Discovery Analytical Sciences, <sup>5</sup>Protein Science, Research and Development, Bristol-Myers Squibb Company, Princeton, NJ, USA; <sup>4</sup>Biologics Manufacturing and Process Development, Global Manufacturing and Supply, Bristol-Myers Squibb Company, Hopewell, NJ, USA; <sup>3</sup>Waters Corporation, Milford, MA, USA

### **Supplemental Figures**

#### Figure S1

Amino acid sequence and peptic peptide coverage for exEGFR when digested alone. Each blue bar under the sequence corresponds to a peptic peptide that was identified. A total of 84.1% linear coverage was obtained for exEGFR. This protein coverage map was generated using the DynamX 2.0 software package (Waters Corp).

#### Figure S2

Amino acid sequence and peptic peptide coverage of exEGFR in the presence of Adnectin 1. Each red bar under the sequence corresponds to a peptic peptide that was identified and for which deuterium uptake was followed (as in Supplemental Figure S3). The followed peptides correspond to 80.3% linear sequence coverage. This protein coverage map was generated using the DynamX 2.0 software package (Waters Corp).

### Figure S3

Deuterium incorporation graphs for the peptic peptides that were followed by HDX MS for exEGFR free (blue) and bound to Adnectin 1 (red). Each datapoint represents the average of two independent measurements. The green boxes indicate the regions where differences in deuterium uptake were observed between free exEGFR and Adnectin 1-bound exEGFR. The graphs were produced by DynamX 2.0 software (Waters Corp.).

### Figure S4

**A.** Amino acid sequence and peptic peptide coverage of Adnectin 1 when digested alone. Each red bar under the sequence corresponds to a peptic peptide that was identified and for which deuterium uptake was followed. **B.** Deuterium incorporation graphs for Adnectin 1 peptic peptides that were followed by HDX MS. Each datapoint represents the average of two independent measurements. The graphs were produced by DynamX 2.0 software (Waters Corp.).

### Figure S5

Verification that deuterium scrambling was negligible during ETD. The relative deuterium content of c ions for triply charged peptide P1 [as described in [1], sequence shown in top panel] was measured using a Synapt G2-S Q-ToF MS. These data are in agreement with previously published results for low scrambling conditions using the Synapt G2 MS in ETD fragmentation mode [2].

## Figure S6

Mass spectra of  $z_{17}$ ,  $z_{16}$ ,  $z_9$ ,  $z_7$ ,  $c_{10}$ , and  $c_2$  ions from the ETD fragmentation of exEGFR peptide 1-19. **A.**  $z$  ions  $z_{17}$ ,  $z_{16}$ ,  $z_9$ ,  $z_7$  showed uptake differences between unbound (blue) and Adnectin 1-bound (red) versions of exEGFR peptide 1-19 whereas **B.**  $c$  ions  $c_{10}$  and  $c_2$  did not. These data were acquired after labeling exEGFR or exEGFR:Adnectin 1 complexes for 30 minutes with deuterium (see main text Methods section).

## **Supplemental References**

- (1) Rand, K. D.; Jorgensen, T. J. Development of a peptide probe for the occurrence of hydrogen ( $1H/2H$ ) scrambling upon gas-phase fragmentation. *Anal Chem* **2007**, 79, 8686-8693.
- (2) Rand, K. D.; Pringle, S. D.; Morris, M.; Engen, J. R.; Brown, J. M. ETD in a traveling wave ion guide at tuned Z-spray ion source conditions allows for site-specific hydrogen/deuterium exchange measurements. *J Am Soc Mass Spectrom* **2011**, 22, 1784-1793.

# Supplemental Figure S1

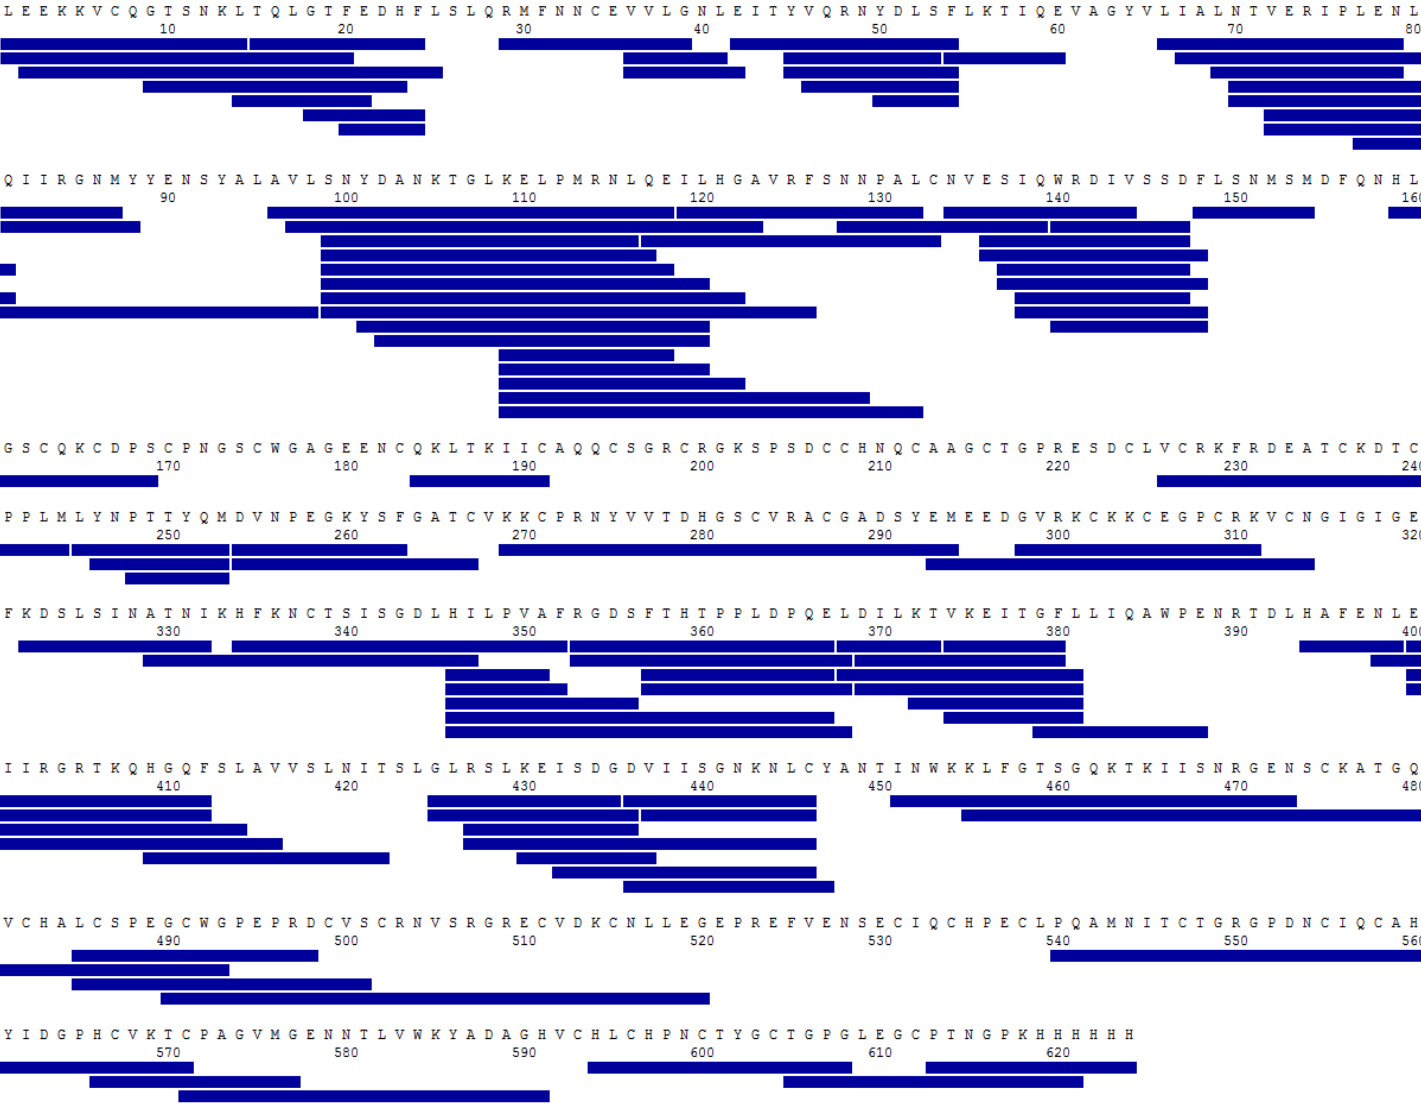

Total: 112 Peptides, 84.1% Coverage, 2.98 Redundancy

# Supplemental Figure S2

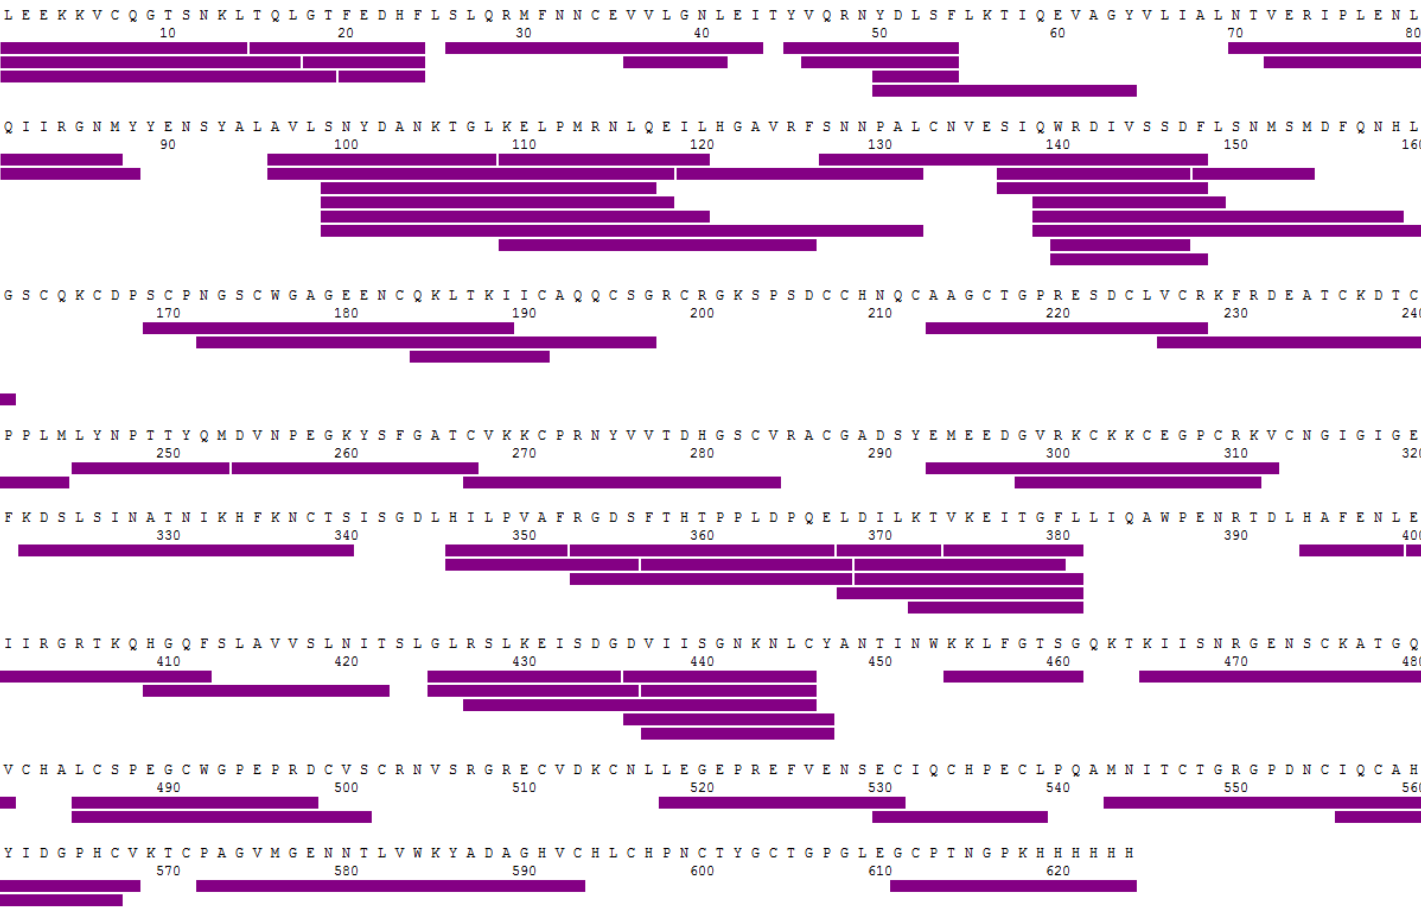

Total: 76 Peptides, 80.3% Coverage, 2.10 Redundancy

● exEGFR + Adnectin  
● exEGFR

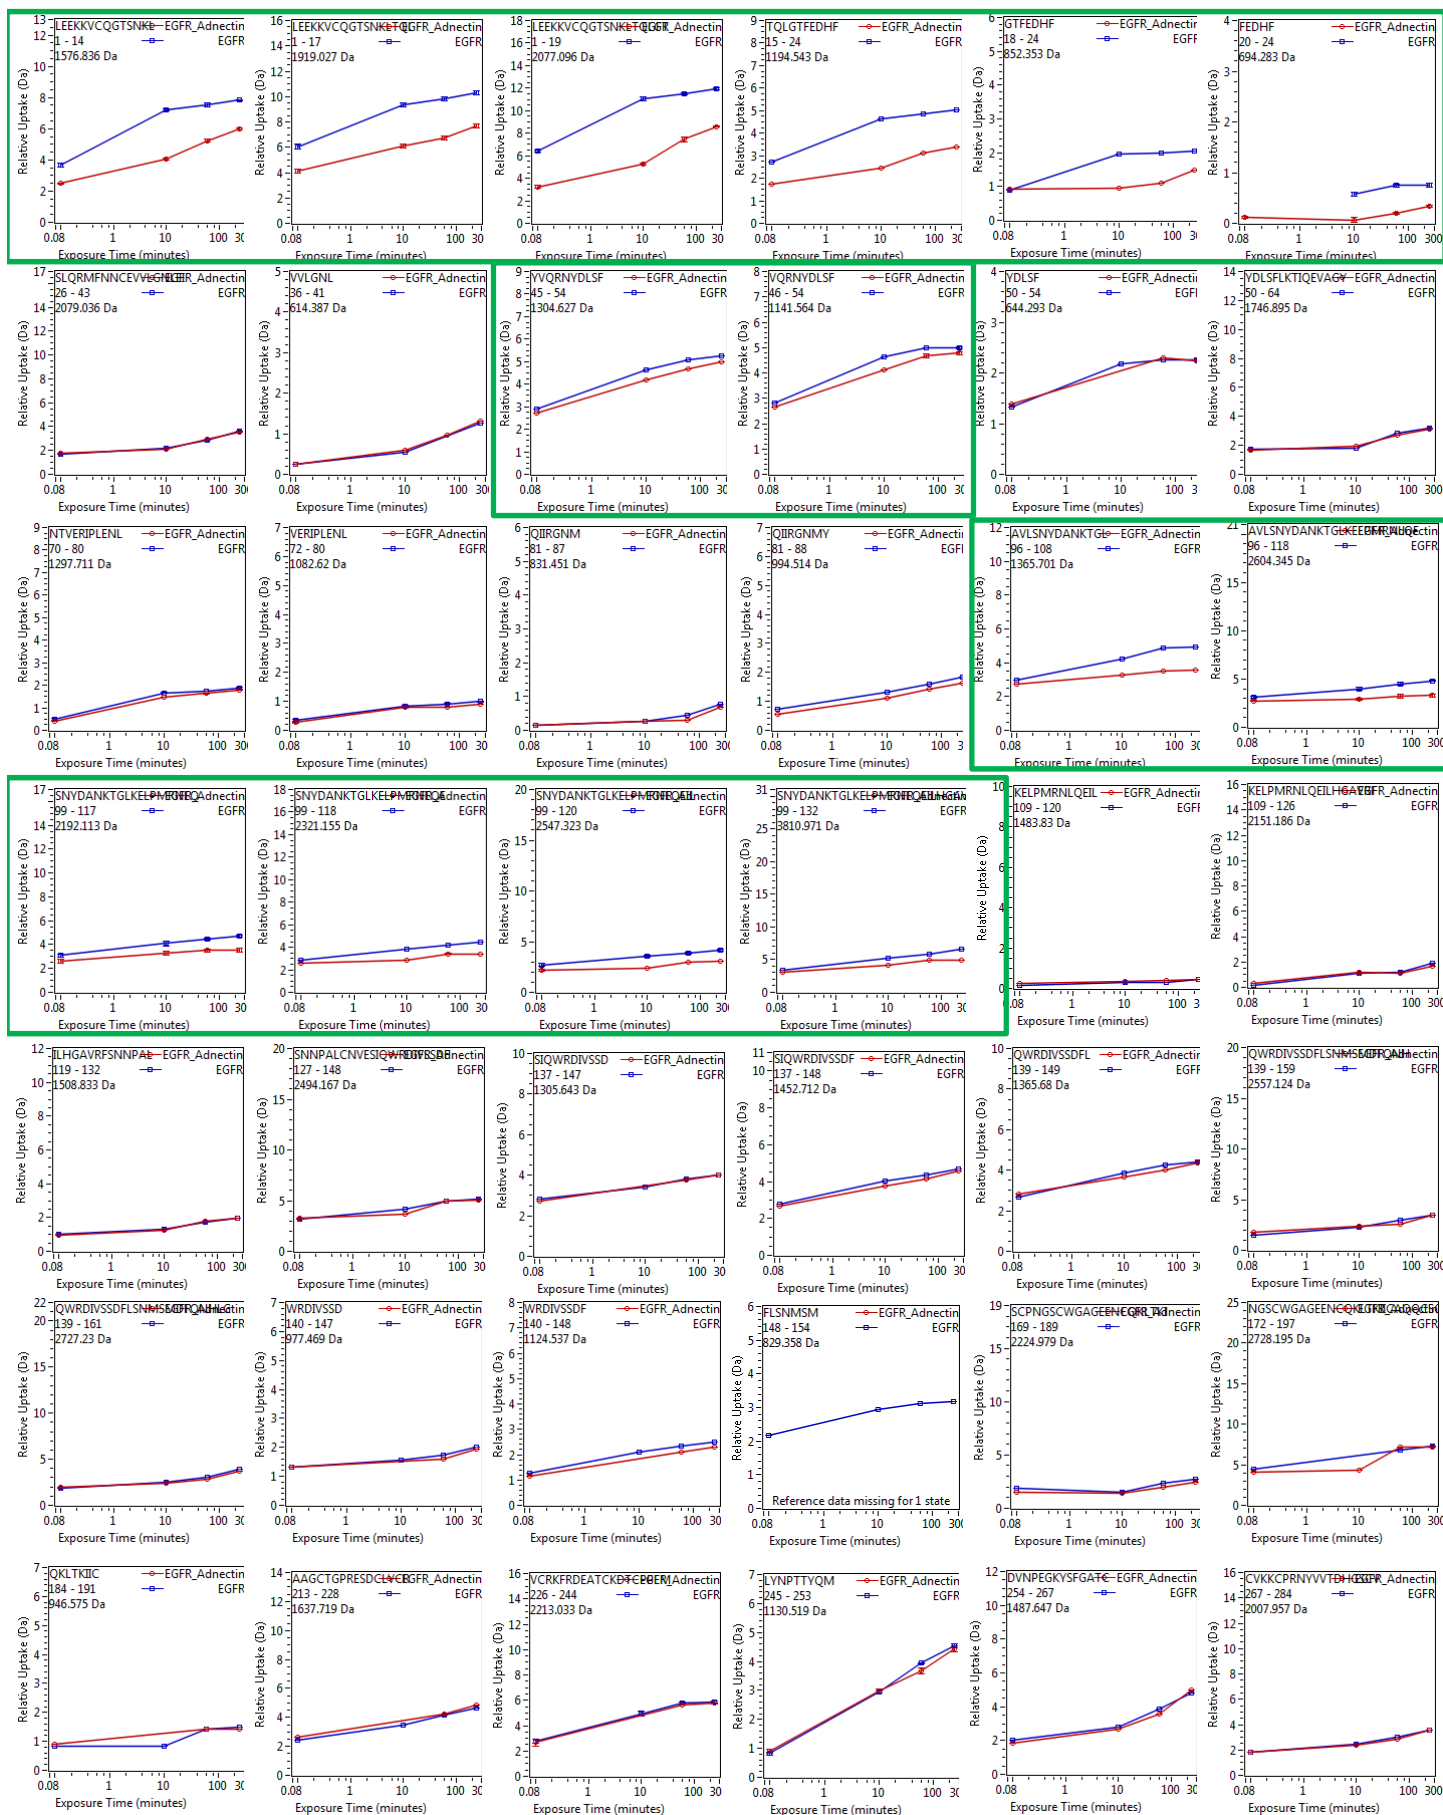

Supplemental Figure S3, cont.

● exEGFR + Adnectin  
● exEGFR

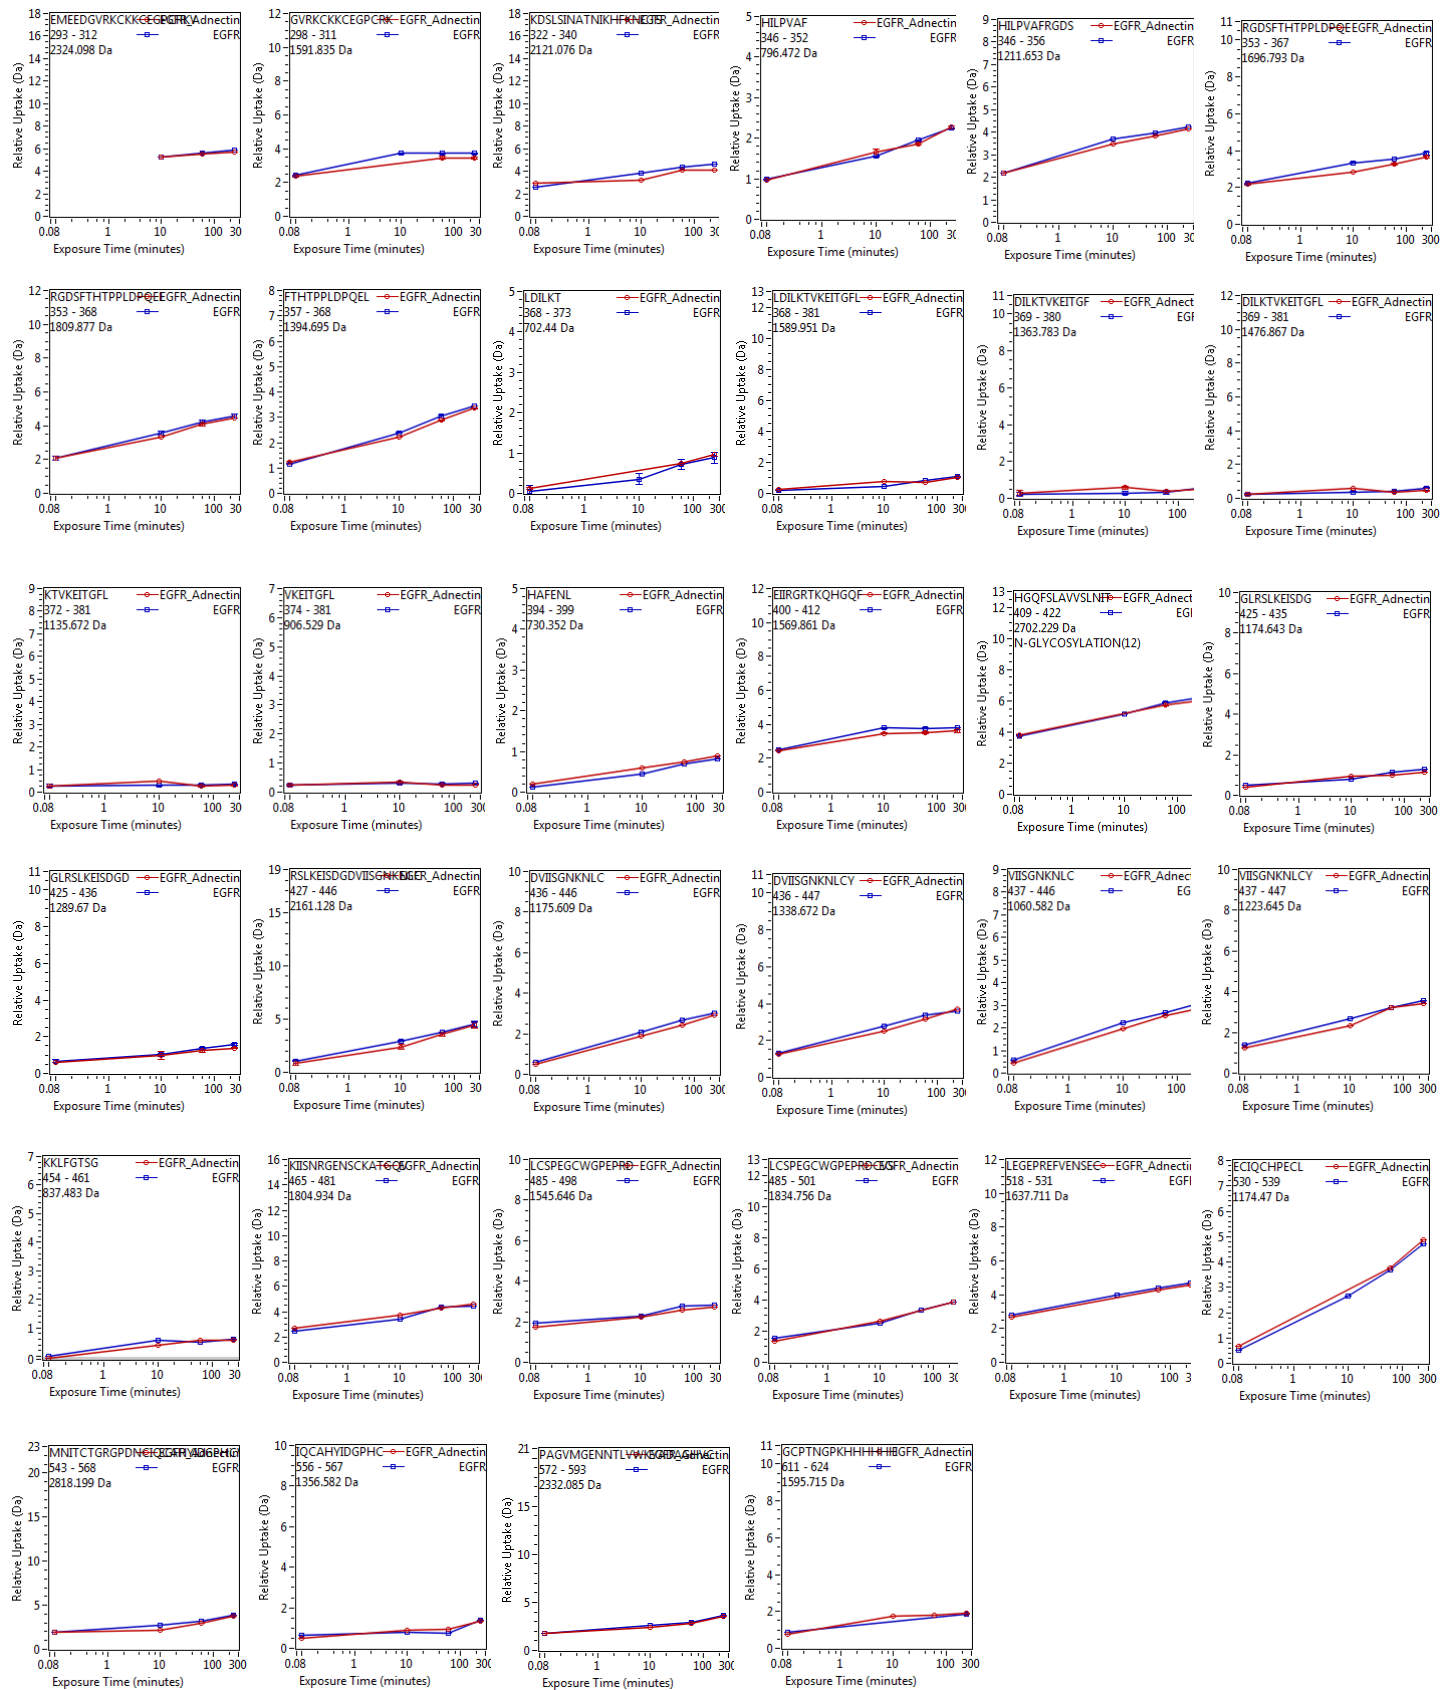

# Supplemental Figure S4

A.

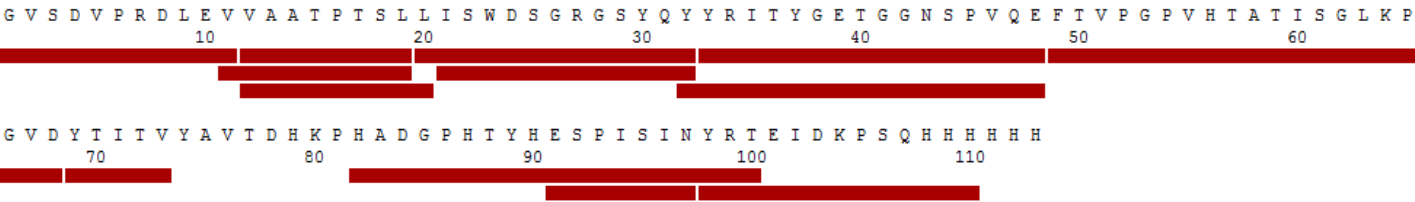

Total: 13 Peptides, 90.3% Coverage, 1.56 Redundancy

B.

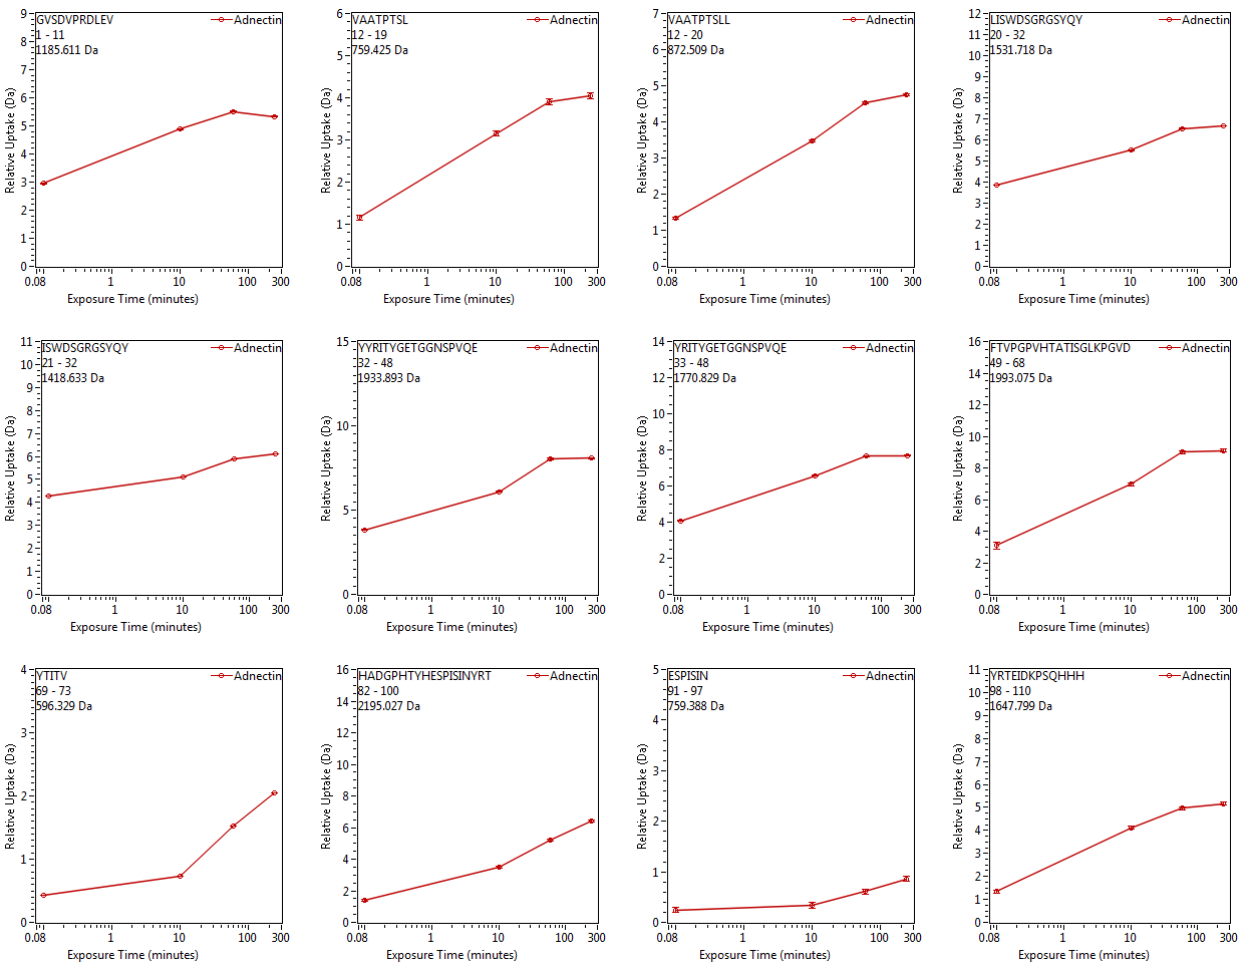

Supplemental Figure S5

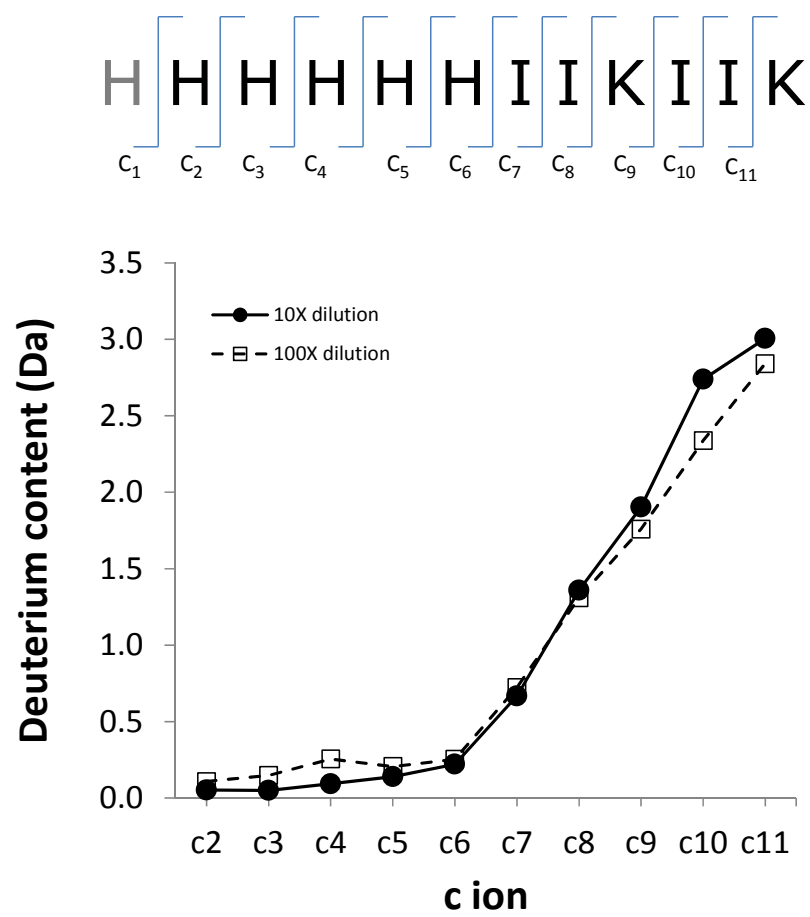

# Supplemental Figure S6

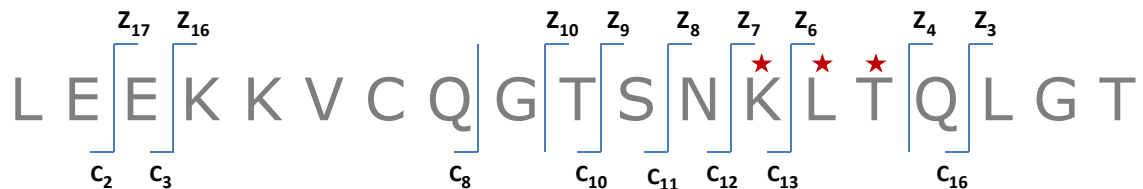

A.

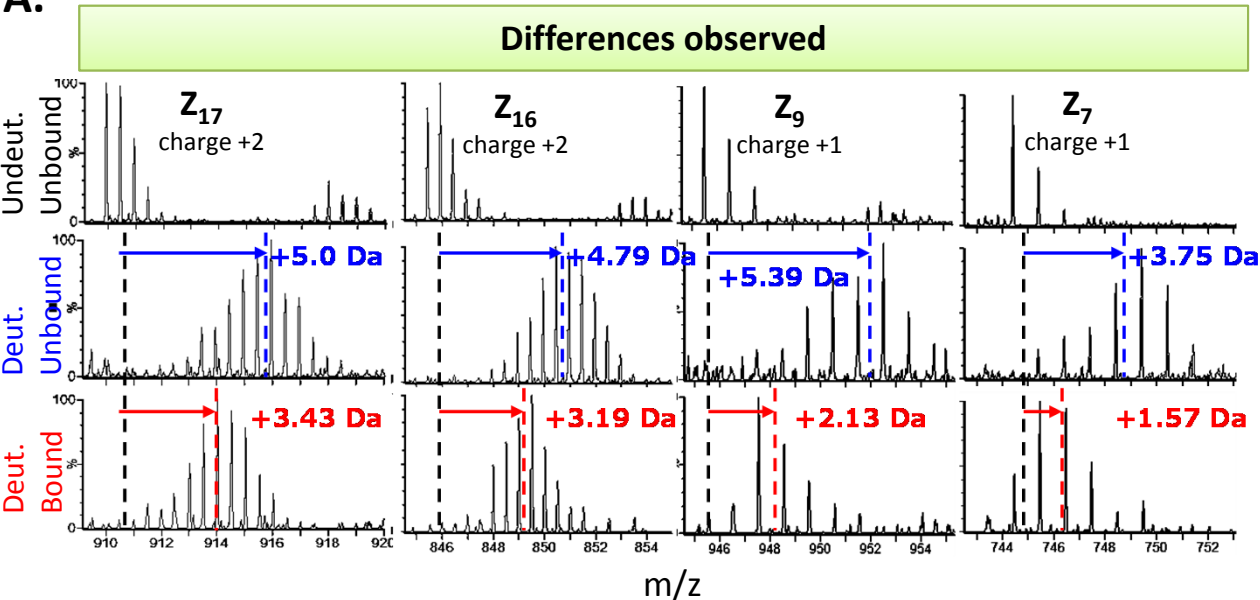

B.

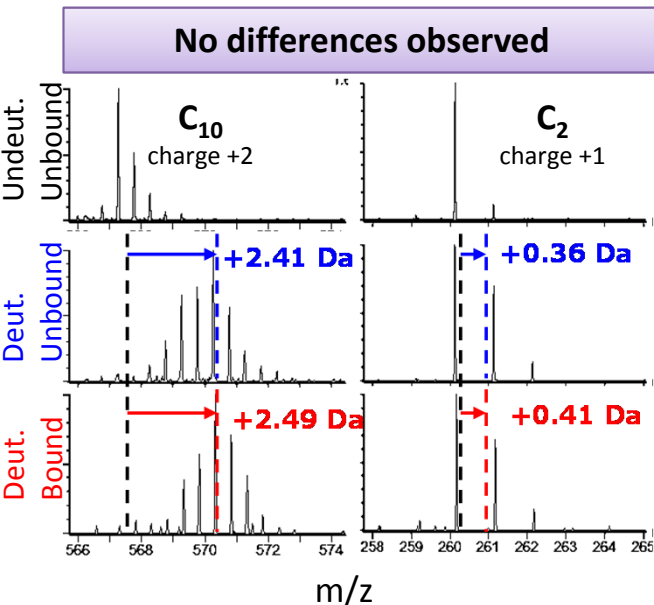

Supplement: NIHMS628678-supplement-13361_2014_973_MOESM1_ESM.pdf [file NIHMS628678-supplement-13361_2014_973_MOESM1_ESM.pdf]
